## List of referees

The editors are pleased to record their thanks to all those listed below, who contributed their time and expertise to review papers submitted to the *ICES Journal of Marine Science* during the year 2003.

- |                |                  |                 |
|----------------|------------------|-----------------|
| D. Agnew       | C. D. Darby      | T. Härkönen     |
| D. Alderman    | J. H. M. David   | S. Harley       |
| J. Anderson    | T. L. O. Davis   | E. Hazen        |
| M. V. Angel    | D. Demer         | C. Heip         |
| A. Arkhipkin   | J. B. Dempson    | David Hirst     |
| E. Aro         | J. W. DeWilde    | J. R. Hislop    |
| F. Arrenhuis   | M. Dickey-Collas | D. Holland      |
| P. J. Auster   | D. Die           | G. Host         |
|                | M. Dorn          | E. D. Houde     |
| M. Basson      | J. Dower         | M. Huiskes      |
| N. Barros      | M. Dredge        | G. Hunt         |
| M. Baumgartner | M. Dreyfus       | G. Huse         |
| D. Beare       |                  | I. Huse         |
| D. M. Beare    | L. van Eeckhaute | J. A. Hutchings |
| S. Bearhop     | S. Ellis         |                 |
| E. Bell        | S. M. Evans      | Jon Hwe         |
| M. Bentley     |                  | E. Jagtman      |
| M. Bergman     | C. Fernandez     | D. W. Japp      |
| O. A. Bergstad | M. Fogarty       | S. Jennings     |
| A. Bertrand    | C. J. Fox        | A. Johannessen  |
| G. Bianchi     | C. Francis       | S. Johnson      |
| S. J. Blaber   | K. Frank         | C. Jones        |
| K. Black       | C. Frid          |                 |
| S. Boletzky    | K. D. Friedland  | D. H. Kang      |
| A. Borja       | J.-M. Fromentin  | M. Kendall      |
| E. Born        | H. Frost         | A. Kenny        |
| P. Boveng      | R. Fryer         | M. Kent         |
| I. L. Boyd     |                  | D. Kimura       |
| K. Brander     | A. Gallego       | M. Kingsley     |
| R. Briggs      | J. Gibson        | J. E. Kirkley   |
| P. J. Bromley  | K. Gilkinson     | G. Kirkwood     |
|                | D. Gillis        | K. H. Kock      |
| N. Cadigan     | O. R. Godø       | I. Kroncke      |
| M. Castro      | A. Goodwin       | S. Kuikka       |
| D. Chu         | D. Gordon        | S. Kupschus     |
| R. Clark       | J. Gordon        |                 |
| M. Clarke      | N. Gorska        | P. A. Large     |
| J. Clayton     | J. Grall         | H. Lassen       |
| L. G. Coggins  | J. M. Green      | R. Law          |
| F. Colijn      | C. Greenlaw      | G. Lawson       |
| M. Collins     | S. Greenstreet   | A. Leising      |
| R. J. Conser   | R. Grift         | P. Lewy         |
| S. Conti       |                  | J. Leonart      |
| R. Cook        | R. Haedrich      | C. Lockyer      |
| P. Corkeron    | T. Hamazaki      | G. Lough        |
| W. Crozier     | M. Hammill       | F. Lucena       |
| G. Cruse       | H. Hansen        |                 |
|                | L. P. Hansen     | G. Macauley     |
| N. Daan        | S. Hansson       | K. MacKenzie    |
| L. Dahl        | G. Harding       | J.-J. Maguire   |

|                        |                  |                  |
|------------------------|------------------|------------------|
| P. Marchal             | T. Polacheck     | E. Stensholt     |
| D. Marcogliese         | D. Ponton        | G. Stenson       |
| T. Marshall            | S. A. Ragnarsson | G. B. Stenson    |
| F. Maynou              | P. Rago          | K. Stergiou      |
| R. Mayo                | K. Ramsay        | J. Stevens       |
| R. McGarvey            | D. Reddin        | P. Stewart       |
| L. McQuinn             | H. Rees          | P. Suuronen      |
| S. Mehle               | S. A. Reeves     | G. Tarling       |
| R. Meyer               | D. Reid          | M. L. Tasker     |
| R. Millar              | J. Rice          | S. Thorrold      |
| R. Mohn                | A. J. Rijnsdorp  | E. Thorstad      |
| A. Moore               | P. Richard       | P. Tiselius      |
| P. G. Moore            | M.-J. Rochet     | S. Tjelmeland    |
| J. Morgan              | B. A. Roel       | C. D. Todd       |
| R. Myers               | S. Rogers        | T. Torgeron      |
| B. Nakashima           | C. Rose          | J. Tranum-Jensen |
| R. Nash                | L. Rudstam       | M. Trevorrow     |
| K. Nedreaas            | H. Rumohr        | I. Tuck          |
| J. Neilson             | J. Salat         | C. Ulrich        |
| H. Ness                | M. Santurtun     | M. Vargas-Jamez  |
| M. O. Nevárez-Martínez | H. Satoshi       | H. van der Veer  |
| A. Newton              | J. Schweigert    | M. Vestergaard   |
| R. Nielsen             | D. H. Secor      | H. Vilhjalmsson  |
| E. North               | F. Serchuk       | R. Villanueva    |
| S. Northridge          | M. Service       | B. Vincent       |
| J. A. A. de Oliveira   | P. Shaw          | J.-H. Volstad    |
| M. Orr                 | P. A. Shelton    | A. Walker        |
| S. J. Painting         | Y. Simand        | R. V. Walker     |
| O. Paramor             | D. Skagen        | M. White         |
| H. Pascoe              | K. Smedbol       | G. Williams      |
| W. Patterson           | P. Snelgrove     | P. R. Witthames  |
| M. G. Pawson           | D. Solomon       | R. J. Wootton    |
| C. Peterson            | D. Somerton      | A. Youngson      |
| U. Piatkowski          | M. Soule         | M. Zimmermann    |
| G. Piet                | H. Sparholt      |                  |
| G. M. Pilling          | J. H. Steele     |                  |
|                        | B. Stensholt     |                  |
